# Supplementary material
Source: publisher figshare collection journal article supplement (https://diabetesjournals.figshare.com/articles/dataset/_/20060480)
Supplement: Supplementary file 1 [file 1]

**Appendix 3.** Distribution of HbA1c levels by visit and group

|                            | Maintainer |             |            | Progressor |             |            | Reverter |             |            |          |
|----------------------------|------------|-------------|------------|------------|-------------|------------|----------|-------------|------------|----------|
|                            | n          | Mean   Freq | Stdev.   % | n          | Mean   Freq | Stdev.   % | n        | Mean   Freq | Stdev.   % | P Value* |
| HbA1C Levels, mean (Stdev) |            |             |            |            |             |            |          |             |            |          |
| IA-1                       | 44         | 5.30        | 0.33       | 21         | 5.50        | 0.38       | 33       | 5.28        | 0.28       | 0.0381   |
| IA-2                       | 65         | 5.30        | 0.34       | 23         | 5.99        | 0.44       | 37       | 5.31        | 0.28       | <.0001   |
| HbA1C >5.7, freq (%)       |            |             |            |            |             |            |          |             |            |          |
| IA-1                       | 44         | 1           | 2.3%       | 21         | 5           | 23.8%      | 33       | 1           | 3.0%       | 0.0066   |
| IA-2                       | 65         | 5           | 7.7%       | 23         | 17          | 73.9%      | 37       | 4           | 10.8%      | <.0001   |

\*Fishers' Exact test was used to test for differences in categorical variables across groups and ANOVA was used to test for differences in continuous variables across groups.
