# Supplementary material
Source: publisher figshare collection journal article supplement (https://diabetesjournals.figshare.com/articles/dataset/_/20060480)
Supplement: Supplementary file 2 [file 1]

## Appendix 8. Heterogeneity due to first appearing autoantibody.

We recognize there is potential heterogeneity due to first appearing autoantibody, which has been shown to be predictive of unique progression patterns. We reviewed the distribution of the endotypes present in the current study population, see Table 1 below. Next, we tested for differences in each of the eigengenes that passed the filtering criteria across the autoantibody endotypes. Due to small samples size in the IA-2A and the ZnT8 groups, we combined these subgroups together. As described in Table 2 below, the difference and/or the average model eigengenes were not significantly different across the endotype groups. Further analysis with larger sample sizes and earlier measures of gene expression prior to onset of islet autoimmunity may be better suited to identify differences in gene co-expression across these autoantibody endotypes.

**Appendix 8 Table 1.** Reversion Incidence by First Appearing Autoantibody Pattern

|                                              | Maintainer (n=66) |           | Progressor (n=25) |           | Reverter (n=47) |           |
|----------------------------------------------|-------------------|-----------|-------------------|-----------|-----------------|-----------|
|                                              | Freq   Mean       | %   Stdev | Freq   Mean       | %   Stdev | Freq   Mean     | %   Stdev |
| <b>Single Autoantibody at IA</b>             |                   |           |                   |           |                 |           |
| IAA                                          | 17                | 25.8%     | 4                 | 16.0%     | 17              | 36.2%     |
| GADA                                         | 33                | 50.0%     | 5                 | 20.0%     | 19              | 40.4%     |
| ZNT8                                         | 4                 | 6.1%      | 2                 | 8.0%      | 6               | 12.8%     |
| IA-2A                                        | 1                 | 1.5%      | 3                 | 12.0%     | 4               | 8.5%      |
| <b>Multiple Autoantibodies Present at IA</b> | 11                | 16.70%    | 11                | 44.00%    | 1               | 2.10%     |

**Appendix 8 Table 2.** Association between difference and average model eigengenes and autoantibody endotypes

|                         | Nominal P Value |
|-------------------------|-----------------|
| <b>Difference Model</b> |                 |
| Darkred                 | 0.8012          |
| Darkgrey                | 0.5967          |
| Darkturquoise           | 0.8720          |
| Darkgreen               | 0.1726          |
| Lightgreen              | 0.7370          |
| <b>Average Model</b>    |                 |
| Darkolivegreen          | 0.8446          |
| Paleturquoise           | 0.8179          |
| White                   | 0.1037          |
| Yellowgreen             | 0.6576          |
