# Supplementary material
Source: publisher figshare collection journal article supplement (https://diabetesjournals.figshare.com/articles/dataset/_/20060480)
Supplement: Supplementary file 3 [file 1]

| EnsemblID       | EnsemblID       | Chr | Gene           | GroupxVisit<br>P value | P value: Progressor<br>vs Maintainer | P value: Progressor<br>vs Reverter | P value: Reverter<br>vs Maintainer | Included in<br>Darkred Module | Identified Pre-T1D in Related Study                                                                                                                                                                       |
|-----------------|-----------------|-----|----------------|------------------------|--------------------------------------|------------------------------------|------------------------------------|-------------------------------|-----------------------------------------------------------------------------------------------------------------------------------------------------------------------------------------------------------|
| ENSG00000112773 | ENSG00000112773 | 6   | FAM46A         | 8.24E-05               | 8.20E-02                             | 7.45E-02                           | 1.54E-05                           |                               | Kallionpaa et al (Progression to T1D vs Matched Controls)                                                                                                                                                 |
| ENSG00000197461 | ENSG00000197461 | 7   | PDGFA          | 9.34E-05               | 5.35E-01                             | 3.97E-04                           | 1.27E-04                           |                               |                                                                                                                                                                                                           |
| ENSG00000050748 | ENSG00000050748 | 5   | MAPK9          | 1.06E-04               | 2.57E-05                             | 5.10E-04                           | 4.58E-01                           |                               |                                                                                                                                                                                                           |
| ENSG00000135424 | ENSG00000135424 | 12  | ITGA7          | 1.09E-04               | 3.70E-02                             | 3.65E-05                           | 3.79E-03                           |                               |                                                                                                                                                                                                           |
| ENSG00000028116 | ENSG00000028116 | 2   | VRK2           | 1.76E-04               | 8.14E-02                             | 1.04E-01                           | 3.48E-05                           |                               |                                                                                                                                                                                                           |
| ENSG00000172650 | ENSG00000172650 | 10  | AGAP5          | 3.51E-04               | 2.36E-02                             | 3.69E-01                           | 1.10E-04                           |                               |                                                                                                                                                                                                           |
| ENSG00000261408 | ENSG00000261408 | 17  | TEN1-CDK3      | 3.75E-04               | 7.92E-05                             | 1.31E-02                           | 8.24E-02                           |                               |                                                                                                                                                                                                           |
| ENSG00000166411 | ENSG00000166411 | 15  | IDH3A          | 5.77E-04               | 4.92E-03                             | 9.73E-01                           | 5.11E-04                           |                               |                                                                                                                                                                                                           |
| ENSG00000135363 | ENSG00000135363 | 11  | LMO2           | 6.35E-04               | 1.24E-01                             | 1.19E-01                           | 1.31E-04                           |                               |                                                                                                                                                                                                           |
| ENSG00000113273 | ENSG00000113273 | 5   | ARSB           | 7.91E-04               | 4.99E-02                             | 2.90E-01                           | 2.09E-04                           |                               |                                                                                                                                                                                                           |
| ENSG00000246082 | ENSG00000246082 | 3   | NUDT16P1       | 8.11E-04               | 3.69E-01                             | 3.63E-02                           | 1.81E-04                           |                               |                                                                                                                                                                                                           |
| ENSG00000079337 | ENSG00000079337 | 12  | RAPGEF3        | 8.28E-04               | 8.41E-01                             | 3.84E-03                           | 4.98E-04                           |                               |                                                                                                                                                                                                           |
| ENSG00000105388 | ENSG00000105388 | 19  | CEACAM5        | 8.61E-04               | 4.25E-02                             | 2.34E-04                           | 1.85E-02                           |                               |                                                                                                                                                                                                           |
| ENSG00000166979 | ENSG00000166979 | 21  | EVA1C          | 8.84E-04               | 1.51E-01                             | 1.13E-01                           | 1.84E-04                           |                               |                                                                                                                                                                                                           |
| ENSG00000086548 | ENSG00000086548 | 19  | CEACAM6        | 1.02E-03               | 1.92E-02                             | 2.23E-04                           | 4.71E-02                           | Yes                           |                                                                                                                                                                                                           |
| ENSG00000184402 | ENSG00000184402 | 20  | SS18L1         | 1.05E-03               | 8.33E-02                             | 2.13E-01                           | 2.46E-04                           |                               |                                                                                                                                                                                                           |
| ENSG00000189042 | ENSG00000189042 | 19  | ZNF567         | 1.08E-03               | 3.03E-01                             | 5.51E-02                           | 2.33E-04                           |                               |                                                                                                                                                                                                           |
| ENSG00000101654 | ENSG00000101654 | 18  | RNMT           | 1.17E-03               | 4.31E-04                             | 9.13E-02                           | 2.70E-02                           |                               |                                                                                                                                                                                                           |
| ENSG00000174004 | ENSG00000174004 | 3   | NRROS          | 1.22E-03               | 2.24E-01                             | 8.45E-02                           | 2.55E-04                           |                               |                                                                                                                                                                                                           |
| ENSG00000134262 | ENSG00000134262 | 1   | AP4B1          | 1.28E-03               | 8.08E-03                             | 9.69E-01                           | 1.02E-03                           |                               |                                                                                                                                                                                                           |
| ENSG00000179044 | ENSG00000179044 | 16  | EXOC3L1        | 1.31E-03               | 2.20E-02                             | 5.96E-01                           | 5.49E-04                           |                               |                                                                                                                                                                                                           |
| ENSG00000205133 | ENSG00000205133 | 8   | TRIQC          | 1.33E-03               | 3.73E-01                             | 1.49E-03                           | 2.31E-03                           |                               | Jin et al 2014 (hazard of progression from IA to T1D)                                                                                                                                                     |
| ENSG00000166619 | ENSG00000166619 | 20  | BLCAP          | 1.49E-03               | 3.66E-04                             | 4.21E-03                           | 4.71E-01                           |                               |                                                                                                                                                                                                           |
| ENSG00000092421 | ENSG00000092421 | 5   | SEMA6A         | 1.53E-03               | 4.32E-03                             | 3.75E-04                           | 2.48E-01                           |                               |                                                                                                                                                                                                           |
| ENSG00000257017 | ENSG00000257017 | 16  | HP             | 1.54E-03               | 2.41E-01                             | 1.06E-03                           | 4.50E-03                           |                               |                                                                                                                                                                                                           |
| ENSG00000263072 | ENSG00000263072 | 16  | RP11-473M20.14 | 1.59E-03               | 6.83E-01                             | 1.92E-02                           | 4.82E-04                           |                               |                                                                                                                                                                                                           |
| ENSG00000114013 | ENSG00000114013 | 3   | CD86           | 1.62E-03               | 9.82E-03                             | 9.47E-01                           | 1.20E-03                           |                               |                                                                                                                                                                                                           |
| ENSG00000253200 | ENSG00000253200 | 8   | RP11-582J16.5  | 1.65E-03               | 3.53E-04                             | 1.40E-02                           | 2.02E-01                           |                               |                                                                                                                                                                                                           |
| ENSG00000085982 | ENSG00000085982 | 2   | USP40          | 1.84E-03               | 2.81E-03                             | 5.15E-01                           | 4.39E-03                           |                               |                                                                                                                                                                                                           |
| ENSG00000122218 | ENSG00000122218 | 1   | COPA           | 1.91E-03               | 1.37E-02                             | 8.52E-01                           | 1.18E-03                           |                               |                                                                                                                                                                                                           |
| ENSG00000116198 | ENSG00000116198 | 1   | CEP104         | 1.95E-03               | 2.67E-01                             | 8.59E-02                           | 4.25E-04                           |                               |                                                                                                                                                                                                           |
|                 |                 |     |                |                        |                                      |                                    |                                    |                               | et al (Seroconverted Cases vs Matched Controls),<br>Kallionpaa et al (Progressors vs Non-Progressors at<br>Seroconversion), and Kallionpaa et al (Progressors vs<br>Non-Progressors after Seroconversion) |
| ENSG00000134321 | ENSG00000134321 | 2   | RSAD2          | 2.02E-03               | 1.25E-01                             | 1.95E-01                           | 4.65E-04                           |                               | Kallionpaa et al (Progression to T1D vs Matched Controls) and Kallionpaa et al (Seroconverted Cases vs Matched Controls)                                                                                  |
| ENSG00000115159 | ENSG00000115159 | 2   | GPD2           | 2.03E-03               | 7.70E-02                             | 2.97E-01                           | 5.29E-04                           |                               |                                                                                                                                                                                                           |
| ENSG00000155097 | ENSG00000155097 | 8   | ATP6V1C1       | 2.16E-03               | 5.83E-01                             | 3.75E-03                           | 2.02E-03                           |                               |                                                                                                                                                                                                           |
| ENSG00000173369 | ENSG00000173369 | 1   | C1QB           | 2.18E-03               | 8.09E-01                             | 1.66E-02                           | 7.61E-04                           |                               |                                                                                                                                                                                                           |
|                 |                 |     |                |                        |                                      |                                    |                                    |                               |                                                                                                                                                                                                           |
| ENSG00000002549 | ENSG00000002549 | 4   | LAP3           | 2.36E-03               | 8.13E-02                             | 3.02E-01                           | 6.19E-04                           |                               |                                                                                                                                                                                                           |
| ENSG00000169021 | ENSG00000169021 | 19  | UQCRRF51       | 2.40E-03               | 3.34E-01                             | 7.21E-02                           | 5.42E-04                           |                               |                                                                                                                                                                                                           |
| ENSG00000082196 | ENSG00000082196 | 5   | C1QTNF3        | 2.42E-03               | 1.35E-01                             | 1.96E-01                           | 5.58E-04                           |                               |                                                                                                                                                                                                           |
| ENSG00000138642 | ENSG00000138642 | 4   | HERC6          | 2.43E-03               | 3.70E-01                             | 6.33E-02                           | 5.61E-04                           |                               |                                                                                                                                                                                                           |
| ENSG00000165655 | ENSG00000165655 | 10  | ZNF503         | 2.58E-03               | 6.54E-01                             | 2.72E-02                           | 7.56E-04                           |                               |                                                                                                                                                                                                           |
|                 |                 |     |                |                        |                                      |                                    |                                    |                               | Ferreira et al 2014 (IFN inducible gene)                                                                                                                                                                  |
| ENSG00000108679 | ENSG00000108679 | 17  | LGALS3BP       | 2.79E-03               | 1.07E-01                             | 2.56E-01                           | 6.91E-04                           |                               | Kallionpaa et al (Progression to T1D vs Matched Controls)                                                                                                                                                 |
| ENSG00000165322 | ENSG00000165322 | 10  | ARHGAP12       | 2.92E-03               | 1.00E-01                             | 9.79E-04                           | 2.11E-02                           |                               |                                                                                                                                                                                                           |
| ENSG00000086061 | ENSG00000086061 | 9   | DNAJA1         | 2.93E-03               | 2.26E-01                             | 1.27E-01                           | 6.53E-04                           |                               |                                                                                                                                                                                                           |
| ENSG00000175348 | ENSG00000175348 | 11  | TMEM9B         | 3.04E-03               | 4.48E-03                             | 5.60E-01                           | 5.87E-03                           |                               |                                                                                                                                                                                                           |
| ENSG00000153037 | ENSG00000153037 | 5   | SRP19          | 3.13E-03               | 2.87E-03                             | 1.21E-03                           | 5.81E-01                           |                               |                                                                                                                                                                                                           |
| ENSG00000171860 | ENSG00000171860 | 12  | C3AR1          | 3.33E-03               | 9.31E-01                             | 1.15E-02                           | 1.63E-03                           |                               |                                                                                                                                                                                                           |

|                 |                 |                  |          |          |          |              |                                                                                                                             |
|-----------------|-----------------|------------------|----------|----------|----------|--------------|-----------------------------------------------------------------------------------------------------------------------------|
| ENSG00000103642 | ENSG00000103642 | 15 LACTB         | 3.37E-03 | 3.16E-01 | 9.14E-02 | 7.67E-04     | Kallionpaa et al (Seroconverted Cases vs Matched Controls)                                                                  |
| ENSG00000137692 | ENSG00000137692 | 11 DCUN1D5       | 3.47E-03 | 9.68E-03 | 8.46E-01 | 3.46E-03     |                                                                                                                             |
| ENSG00000236053 | ENSG00000236053 | 13 LINC01067     | 3.49E-03 | 6.82E-02 | 4.01E-01 | 1.04E-03     | Kallionpaa et al (Seroconverted Cases vs Matched Controls)                                                                  |
| ENSG00000114650 | ENSG00000114650 | 3 SCAP           | 3.69E-03 | 1.86E-02 | 8.88E-01 | 2.26E-03     |                                                                                                                             |
| ENSG00000130202 | ENSG00000130202 | 19 PVRL2         | 3.70E-03 | 3.06E-02 | 6.87E-01 | 1.65E-03     |                                                                                                                             |
| ENSG00000142751 | ENSG00000142751 | 1 GPN2           | 3.82E-03 | 9.82E-01 | 1.53E-02 | 1.64E-03     |                                                                                                                             |
| ENSG00000164096 | ENSG00000164096 | 4 C4orf3         | 3.86E-03 | 2.21E-01 | 2.01E-03 | 1.12E-02     |                                                                                                                             |
| ENSG00000212961 | ENSG00000212961 | 11 HNRNPA1P40    | 4.05E-03 | 3.74E-03 | 4.14E-01 | 1.14E-02     |                                                                                                                             |
| ENSG00000146707 | ENSG00000146707 | 7 POMZP3         | 4.10E-03 | 2.41E-02 | 9.37E-04 | 1.16E-01     |                                                                                                                             |
| ENSG00000129911 | ENSG00000129911 | 19 KLF16         | 4.14E-03 | 1.43E-03 | 4.32E-03 | 8.10E-01     |                                                                                                                             |
| ENSG00000181481 | ENSG00000181481 | 17 RNF135        | 4.20E-03 | 4.11E-03 | 4.39E-01 | 1.08E-02     |                                                                                                                             |
| ENSG00000257702 | ENSG00000257702 | 2 LBX2-AS1       | 4.21E-03 | 9.62E-04 | 1.99E-02 | 2.75E-01     |                                                                                                                             |
| ENSG00000171101 | ENSG00000171101 | 19 SIGLEC17P     | 4.22E-03 | 6.39E-02 | 4.52E-01 | 1.33E-03     | et al (Seroconverted Cases vs Matched Controls), and Kallionpaa et al (Progressors vs Non-Progressors after Seroconversion) |
| ENSG00000213066 | ENSG00000213066 | 6 FGFR1OP        | 4.29E-03 | 1.86E-01 | 1.85E-01 | 1.00E-03     |                                                                                                                             |
| ENSG00000129636 | ENSG00000129636 | 16 ITFG1         | 4.43E-03 | 6.19E-01 | 6.70E-03 | 3.66E-03     | Kallionpaa et al (Progressors vs Non-Progressors after Seroconversion)                                                      |
| ENSG00000225850 | ENSG00000225850 | 10 RP11-452K12.4 | 4.53E-03 | 2.82E-02 | 1.05E-03 | 1.09E-01     |                                                                                                                             |
| ENSG00000068079 | ENSG00000068079 | 17 IFI35         | 4.73E-03 | 2.96E-01 | 1.17E-01 | 1.09E-03     | Ferreira et al 2014 (IFN inducible gene)                                                                                    |
| ENSG00000111331 | ENSG00000111331 | 12 OAS3          | 4.81E-03 | 1.03E-01 | 3.32E-01 | 1.30E-03     |                                                                                                                             |
| ENSG00000164047 | ENSG00000164047 | 3 CAMP           | 4.84E-03 | 1.33E-02 | 1.17E-03 | 2.27E-01 Yes |                                                                                                                             |
| ENSG00000148346 | ENSG00000148346 | 9 LCN2           | 4.92E-03 | 3.84E-02 | 1.18E-03 | 8.65E-02 Yes |                                                                                                                             |
| ENSG00000122643 | ENSG00000122643 | 7 NT5C3A         | 4.94E-03 | 4.83E-01 | 6.31E-02 | 1.26E-03     |                                                                                                                             |
| ENSG00000180855 | ENSG00000180855 | 19 ZNF443        | 4.94E-03 | 2.85E-03 | 2.61E-03 | 8.12E-01     |                                                                                                                             |
| ENSG00000134326 | ENSG00000134326 | 2 CMPK2          | 5.00E-03 | 1.09E-01 | 3.20E-01 | 1.33E-03     |                                                                                                                             |
| ENSG00000152684 | ENSG00000152684 | 5 PELO           | 5.01E-03 | 1.54E-03 | 9.59E-02 | 7.35E-02     |                                                                                                                             |
| ENSG00000111452 | ENSG00000111452 | 12 GPR133        | 5.02E-03 | 1.29E-03 | 1.05E-02 | 4.97E-01     |                                                                                                                             |
| ENSG00000173786 | ENSG00000173786 | 17 CNP           | 5.15E-03 | 7.68E-02 | 4.27E-01 | 1.57E-03     | Kallionpaa et al (Progression to T1D vs Matched Controls)                                                                   |
| ENSG00000142188 | ENSG00000142188 | 21 TMEM50B       | 5.20E-03 | 3.42E-01 | 1.03E-01 | 1.23E-03     |                                                                                                                             |
| ENSG00000160714 | ENSG00000160714 | 1 UBE2Q1         | 5.21E-03 | 1.28E-01 | 2.85E-01 | 1.34E-03     | Ferreira et al 2014 (IFN inducible gene)                                                                                    |
| ENSG00000178057 | ENSG00000178057 | 3 NDUFAF3        | 5.25E-03 | 1.57E-01 | 2.06E-03 | 2.16E-02     |                                                                                                                             |
| ENSG00000157212 | ENSG00000157212 | 7 PAXIP1         | 5.26E-03 | 7.44E-01 | 3.24E-02 | 1.69E-03     |                                                                                                                             |
| ENSG00000070190 | ENSG00000070190 | 4 DAPP1          | 5.29E-03 | 7.61E-01 | 1.05E-02 | 3.30E-03     |                                                                                                                             |
| ENSG00000055483 | ENSG00000055483 | 17 USP36         | 5.37E-03 | 9.53E-02 | 3.68E-01 | 1.52E-03     |                                                                                                                             |
| ENSG00000105671 | ENSG00000105671 | 19 DDX49         | 5.41E-03 | 1.91E-03 | 1.31E-01 | 5.62E-02     |                                                                                                                             |
| ENSG00000125977 | ENSG00000125977 | 20 EIF2S2        | 5.44E-03 | 8.19E-01 | 1.22E-02 | 3.08E-03     |                                                                                                                             |
| ENSG00000143756 | ENSG00000143756 | 1 FBXO28         | 5.45E-03 | 4.53E-03 | 2.11E-03 | 6.09E-01     |                                                                                                                             |
| ENSG00000164821 | ENSG00000164821 | 8 DEFA4          | 5.47E-03 | 1.93E-02 | 1.29E-03 | 1.79E-01 Yes |                                                                                                                             |
| ENSG00000134827 | ENSG00000134827 | 11 TCN1          | 5.60E-03 | 1.59E-02 | 1.35E-03 | 2.18E-01 Yes | Ferreira et al 2014 (IFN inducible gene)                                                                                    |
| ENSG00000173548 | ENSG00000173548 | 15 SNX33         | 5.64E-03 | 2.05E-02 | 1.33E-03 | 1.74E-01     |                                                                                                                             |
| ENSG00000129515 | ENSG00000129515 | 14 SNX6          | 5.72E-03 | 3.58E-02 | 7.24E-01 | 2.61E-03     |                                                                                                                             |
| ENSG00000167208 | ENSG00000167208 | 16 SNX20         | 5.80E-03 | 2.77E-01 | 1.39E-01 | 1.36E-03     |                                                                                                                             |
| ENSG00000231721 | ENSG00000231721 | 7 LINC-PINT      | 5.82E-03 | 3.34E-03 | 2.78E-01 | 2.53E-02     |                                                                                                                             |
| ENSG00000196378 | ENSG00000196378 | 8 ZNF34          | 5.88E-03 | 1.02E-01 | 1.83E-03 | 3.77E-02     |                                                                                                                             |
| ENSG00000163840 | ENSG00000163840 | 3 DTX3L          | 5.90E-03 | 2.95E-01 | 1.31E-01 | 1.39E-03     |                                                                                                                             |
| ENSG00000132436 | ENSG00000132436 | 7 FIGNL1         | 5.94E-03 | 3.43E-03 | 3.06E-03 | 8.06E-01     |                                                                                                                             |
| ENSG00000166348 | ENSG00000166348 | 10 USP54         | 5.98E-03 | 1.23E-01 | 3.13E-01 | 1.59E-03     |                                                                                                                             |
| ENSG00000079134 | ENSG00000079134 | 18 THOC1         | 6.06E-03 | 7.33E-02 | 4.69E-01 | 1.94E-03     | Ferreira et al 2014 (IFN inducible gene)                                                                                    |
| ENSG00000121848 | ENSG00000121848 | 1 RNF115         | 6.10E-03 | 9.34E-01 | 2.27E-02 | 2.43E-03     |                                                                                                                             |
| ENSG00000160216 | ENSG00000160216 | 21 AGPAT3        | 6.10E-03 | 4.01E-02 | 6.94E-01 | 2.65E-03     |                                                                                                                             |
| ENSG00000161267 | ENSG00000161267 | 3 BDH1           | 6.13E-03 | 6.71E-01 | 9.44E-03 | 4.47E-03     |                                                                                                                             |
| ENSG00000105281 | ENSG00000105281 | 19 SLC1A5        | 6.23E-03 | 5.60E-01 | 5.74E-02 | 1.69E-03     |                                                                                                                             |
| ENSG00000076067 | ENSG00000076067 | 12 RBMS2         | 6.25E-03 | 5.32E-02 | 5.89E-01 | 2.34E-03     |                                                                                                                             |

|                 |                   |                |          |          |          |          |
|-----------------|-------------------|----------------|----------|----------|----------|----------|
| ENSG00000174353 | ENSG00000174353   | 7 STAG3L3      | 6.49E-03 | 3.01E-01 | 1.34E-01 | 1.54E-03 |
| ENSG00000179630 | ENSG00000179630   | 13 LACC1       | 6.54E-03 | 8.70E-01 | 1.54E-02 | 3.40E-03 |
| ENSG00000013563 | ENSG00000013563 X | DNASE1L1       | 6.59E-03 | 5.01E-01 | 6.98E-02 | 1.71E-03 |
| ENSG00000064201 | ENSG00000064201   | 11 TSPAN32     | 6.61E-03 | 5.31E-02 | 6.01E-01 | 2.51E-03 |
| ENSG00000068793 | ENSG00000068793   | 15 CYFIP1      | 6.62E-03 | 1.42E-01 | 2.88E-01 | 1.71E-03 |
| ENSG00000130147 | ENSG00000130147   | 2 SH3BP4       | 6.72E-03 | 2.25E-03 | 6.88E-03 | 7.86E-01 |
| ENSG00000233368 | ENSG00000233368   | 1 RP11-277L2.3 | 6.77E-03 | 8.16E-01 | 1.39E-02 | 3.82E-03 |
| ENSG00000136827 | ENSG00000136827   | 9 TOR1A        | 6.82E-03 | 2.46E-01 | 1.71E-01 | 1.62E-03 |
| ENSG00000163577 | ENSG00000163577   | 3 EIF5A2       | 6.84E-03 | 2.52E-02 | 9.19E-01 | 4.15E-03 |
| ENSG00000124374 | ENSG00000124374   | 2 PAIP2B       | 6.89E-03 | 5.07E-02 | 1.72E-03 | 8.73E-02 |
| ENSG00000205670 | ENSG00000205670   | 21 SMIM11      | 6.96E-03 | 2.45E-01 | 3.48E-03 | 1.68E-02 |
| ENSG00000104856 | ENSG00000104856   | 19 RELB        | 7.03E-03 | 5.29E-01 | 7.46E-03 | 6.86E-03 |
| ENSG00000271913 | ENSG00000271913   | 6 RP1-111C20.4 | 7.07E-03 | 1.78E-03 | 1.62E-02 | 4.44E-01 |

et al (Progressors vs Non-Progressors at Seroconversion), and Kallionpaa et al (Progressors vs Non-Progressors after Seroconversion)

|                 |                 |              |          |          |          |          |
|-----------------|-----------------|--------------|----------|----------|----------|----------|
| ENSG00000137965 | ENSG00000137965 | 1 IFI44      | 7.30E-03 | 1.67E-01 | 2.60E-01 | 1.84E-03 |
| ENSG00000055130 | ENSG00000055130 | 7 CUL1       | 7.34E-03 | 3.83E-02 | 7.57E-01 | 3.45E-03 |
| ENSG00000184979 | ENSG00000184979 | 22 USP18     | 7.35E-03 | 2.51E-01 | 1.74E-01 | 1.76E-03 |
| ENSG00000175768 | ENSG00000175768 | 9 TOMM5      | 7.42E-03 | 2.67E-03 | 6.62E-03 | 8.52E-01 |
| ENSG00000251259 | ENSG00000251259 | 4 AC004069.2 | 7.44E-03 | 9.70E-02 | 2.21E-03 | 4.85E-02 |
| ENSG00000172766 | ENSG00000172766 | 13 NAA16     | 7.50E-03 | 1.55E-01 | 2.76E-03 | 2.98E-02 |
| ENSG00000105829 | ENSG00000105829 | 7 BET1       | 7.64E-03 | 5.74E-01 | 8.79E-03 | 6.70E-03 |
| ENSG00000132963 | ENSG00000132963 | 13 POMP      | 7.68E-03 | 2.25E-01 | 1.99E-01 | 1.86E-03 |

Ferreira et al 2014 (IFN inducible gene)  
Kallionpaa et al (Progression to T1D vs Matched

|                 |                   |                  |          |          |          |              |
|-----------------|-------------------|------------------|----------|----------|----------|--------------|
| ENSG00000135148 | ENSG00000135148   | 12 TRAFD1        | 7.71E-03 | 7.82E-01 | 3.71E-02 | 2.58E-03     |
| ENSG00000172432 | ENSG00000172432   | 6 GTPBP2         | 7.83E-03 | 6.78E-01 | 4.80E-02 | 2.36E-03     |
| ENSG00000154832 | ENSG00000154832   | 18 CXXC1         | 8.07E-03 | 4.40E-03 | 2.84E-01 | 3.17E-02     |
| ENSG00000130347 | ENSG00000130347   | 6 RTN4IP1        | 8.12E-03 | 2.81E-03 | 1.41E-01 | 7.03E-02     |
| ENSG00000269640 | ENSG00000269640   | 19 CTD-2521M24.9 | 8.12E-03 | 5.23E-02 | 6.52E-01 | 3.27E-03     |
| ENSG00000273033 | ENSG00000273033   | 3 RP11-67L2.2    | 8.21E-03 | 2.03E-03 | 2.15E-02 | 3.93E-01     |
| ENSG00000205580 | ENSG00000205580   | 7 AC006995.8     | 8.28E-03 | 7.76E-01 | 1.46E-02 | 4.94E-03     |
| ENSG00000112877 | ENSG00000112877   | 5 CEP72          | 8.32E-03 | 2.22E-02 | 2.05E-03 | 2.20E-01     |
| ENSG00000010671 | ENSG00000010671 X | BTB              | 8.34E-03 | 8.13E-01 | 1.59E-02 | 4.69E-03     |
| ENSG00000105402 | ENSG00000105402   | 19 NAPA          | 8.51E-03 | 3.69E-01 | 1.20E-01 | 2.09E-03     |
| ENSG00000261490 | ENSG00000261490   | 4 RP11-448G15.3  | 8.58E-03 | 9.46E-03 | 5.70E-01 | 1.36E-02     |
| ENSG00000231889 | ENSG00000231889   | 6 TRAF3IP2-AS1   | 8.72E-03 | 2.20E-01 | 2.15E-01 | 2.15E-03     |
| ENSG00000124469 | ENSG00000124469   | 19 CEACAM8       | 8.73E-03 | 6.89E-02 | 2.31E-03 | 7.87E-02 Yes |
| ENSG00000156239 | ENSG00000156239   | 21 N6AMT1        | 8.79E-03 | 9.22E-02 | 4.58E-01 | 2.74E-03     |
| ENSG00000163322 | ENSG00000163322   | 4 FAM175A        | 8.82E-03 | 1.65E-02 | 2.32E-03 | 3.01E-01     |
| ENSG00000188739 | ENSG00000188739   | 1 RBM34          | 8.91E-03 | 1.12E-02 | 2.67E-03 | 4.23E-01     |
| ENSG00000168899 | ENSG00000168899   | 2 VAMP5          | 8.97E-03 | 6.28E-03 | 3.86E-01 | 2.36E-02     |
| ENSG00000240356 | ENSG00000240356   | 2 RPL23AP7       | 9.00E-03 | 2.26E-03 | 2.15E-02 | 4.17E-01     |
| ENSG00000182272 | ENSG00000182272   | 11 B4GALNT4      | 9.03E-03 | 1.63E-01 | 2.91E-01 | 2.36E-03     |
| ENSG00000228589 | ENSG00000228589   | 1 SPCS2P4        | 9.15E-03 | 1.53E-02 | 2.48E-03 | 3.30E-01     |
| ENSG00000180061 | ENSG00000180061   | 19 TMEM150B      | 9.18E-03 | 3.55E-01 | 1.31E-01 | 2.25E-03     |
| ENSG00000255441 | ENSG00000255441   | 19 CTD-2616J11.2 | 9.20E-03 | 3.29E-01 | 1.43E-01 | 2.25E-03     |
| ENSG00000163956 | ENSG00000163956   | 4 LRPAP1         | 9.27E-03 | 5.68E-01 | 6.99E-02 | 2.56E-03     |
| ENSG00000188056 | ENSG00000188056   | 6 TREML4         | 9.43E-03 | 2.35E-03 | 2.38E-02 | 3.97E-01     |
| ENSG00000139180 | ENSG00000139180   | 12 NDUFA9        | 9.53E-03 | 4.22E-03 | 2.25E-01 | 4.76E-02     |
| ENSG00000007516 | ENSG00000007516   | 16 BAIAP3        | 9.72E-03 | 3.96E-02 | 8.13E-01 | 4.85E-03     |
| ENSG00000160685 | ENSG00000160685   | 1 ZBTB7B         | 9.76E-03 | 2.74E-01 | 4.96E-03 | 2.01E-02     |
| ENSG00000197409 | ENSG00000197409   | 6 HIST1H3D       | 9.85E-03 | 2.60E-03 | 6.94E-02 | 1.63E-01     |
| ENSG00000198720 | ENSG00000198720   | 17 ANKRD13B      | 9.85E-03 | 3.49E-03 | 1.56E-01 | 7.31E-02     |
| ENSG00000203814 | ENSG00000203814   | 1 HIST2H2BF      | 9.88E-03 | 7.18E-01 | 1.45E-02 | 6.45E-03     |
| ENSG00000105048 | ENSG00000105048   | 19 TNNT1         | 9.92E-03 | 1.16E-01 | 3.07E-03 | 5.18E-02     |

Kallionpaa et al (Progression to T1D vs Matched Controls)

Kallionpaa et al (Seroconverted Cases vs Matched

Kallionpaa et al (Progression to T1D vs Matched

Kallionpaa et al (Seroconverted Cases vs Matched

|                 |                 |        |          |          |          |          |
|-----------------|-----------------|--------|----------|----------|----------|----------|
| ENSG00000106100 | ENSG00000106100 | 7 NOD1 | 9.99E-03 | 5.45E-03 | 3.01E-01 | 3.51E-02 |
|-----------------|-----------------|--------|----------|----------|----------|----------|
