# Supplementary material
Source: publisher figshare collection journal article supplement (https://diabetesjournals.figshare.com/articles/dataset/_/20060480)
Supplement: Supplementary file 4 [file 1]

## Appendix 2. Comparison of Demographics and Clinical Characteristics in Full Cohort vs Overlapping Samples

|                                                             | Full Cohort (n=138) |           | Overlap (n=55) |           |
|-------------------------------------------------------------|---------------------|-----------|----------------|-----------|
|                                                             | Freq   Mean         | %   Stdev | Freq   Mean    | %   Stdev |
| <b>IA Progression Phenotype</b>                             |                     |           |                |           |
| Progressor                                                  | 25                  | 18.12%    | 23             | 41.8%     |
| Reverter                                                    | 47                  | 34.06%    | 10             | 18.2%     |
| Maintainer                                                  | 66                  | 47.83%    | 22             | 40.0%     |
| <b>Multiple Autoantibodies at Onset of IA*, n (%)</b>       | 11                  | 16.7%     | 15             | 27.3%     |
| <b>Non-Hispanic White Ethnicity, n (%)</b>                  | 47                  | 71.2%     | 43             | 78.2%     |
| <b>Female Sex, n (%)</b>                                    | 35                  | 53.0%     | 28             | 50.9%     |
| <b>DR3/4 Genotype, n (%)</b>                                | 17                  | 25.8%     | 22             | 40.0%     |
| <b>Family History/Affected First Degree Relative, n (%)</b> | 42                  | 63.6%     | 33             | 60.0%     |
| <b>Age at Onset of IA*, mean (Stdev)</b>                    | 8.6                 | 4.5       | 8.8            | 4.9       |

\*Onset of IA defined as the first study visit among the first two consecutive study visits where the individual tested positive for one or more autoantibodies
