# Supplementary material
Source: publisher figshare collection journal article supplement (https://diabetesjournals.figshare.com/articles/dataset/_/20060480)
Supplement: Supplementary file 6 [file 1]

**Appendix 6.** Network Module Candidates Where Module Eigengene Explained >60% of Variation

| Module Name             | Size | Proportion Variance Explained | Nominal p value | FDR Adjusted P Value |
|-------------------------|------|-------------------------------|-----------------|----------------------|
| <b>Average Model</b>    |      |                               |                 |                      |
| darkolivegreen          | 15   | 0.66                          | 0.0395          | 0.1579               |
| yellowgreen             | 11   | 0.69                          | 0.6702          | 0.8699               |
| paleturquoise           | 17   | 0.66                          | 0.7187          | 0.8699               |
| white                   | 27   | 0.60                          | 0.8699          | 0.8699               |
| <b>Difference Model</b> |      |                               |                 |                      |
| darkred                 | 14   | 0.69                          | 0.0056          | 0.0223               |
| darkgrey                | 10   | 0.69                          | 0.5600          | 0.8586               |
| darkturquoise           | 11   | 0.64                          | 0.6905          | 0.8586               |
| darkgreen               | 12   | 0.61                          | 0.8586          | 0.8586               |

Proportion of variance explained = proportion of variance explained by eigengene of 1st principal component from PCA that includes all genes within the module

\*Adjusted based on Benjamini-Liu method
