# Supplementary material
Source: publisher figshare collection journal article supplement (https://diabetesjournals.figshare.com/articles/dataset/_/20060480)
Supplement: Supplementary file 7 [file 1]

| EnsemblID       | Gene           | Chr | Group: P<br>value | P value: Progressor<br>vs Maintainer | P value: Reverter<br>vs Maintainer | P value: Progressor vs<br>Reverter | Included in<br>Darkred Module | Identified Pre-T1D in<br>Related Study |
|-----------------|----------------|-----|-------------------|--------------------------------------|------------------------------------|------------------------------------|-------------------------------|----------------------------------------|
| ENSG00000262468 | RP11-95P2.1    | 16  | 2.76E-05          | 8.20E-06                             | 1.01E-02                           | 1.72E-02                           |                               |                                        |
| ENSG00000187990 | HIST1H2BG      | 6   | 3.43E-05          | 1.23E-04                             | 2.87E-01                           | 1.02E-05                           |                               |                                        |
| ENSG00000124459 | ZNF45          | 19  | 5.97E-04          | 3.09E-02                             | 1.92E-02                           | 1.52E-04                           |                               |                                        |
| ENSG00000100348 | TXN2           | 22  | 8.72E-04          | 2.62E-01                             | 2.47E-03                           | 7.63E-04                           |                               |                                        |
| ENSG00000197696 | NMB            | 15  | 9.73E-04          | 3.82E-04                             | 8.78E-01                           | 1.05E-03                           |                               |                                        |
| ENSG00000133243 | BTBD2          | 19  | 1.02E-03          | 2.74E-04                             | 5.61E-01                           | 2.29E-03                           |                               |                                        |
| ENSG00000145246 | ATP10D         | 4   | 1.16E-03          | 7.10E-04                             | 8.25E-01                           | 7.02E-04                           |                               |                                        |
| ENSG00000163661 | PTX3           | 3   | 1.30E-03          | 4.24E-04                             | 7.40E-01                           | 1.79E-03                           |                               |                                        |
| ENSG00000025800 | KPNA6          | 1   | 1.42E-03          | 8.00E-03                             | 1.39E-01                           | 3.05E-04                           |                               |                                        |
| ENSG00000171953 | ATPAF2         | 17  | 1.51E-03          | 3.75E-01                             | 2.61E-03                           | 1.67E-03                           |                               |                                        |
| ENSG00000142528 | ZNF473         | 19  | 1.60E-03          | 4.73E-01                             | 3.95E-04                           | 3.64E-02                           |                               |                                        |
| ENSG00000223519 | KIF28P         | 1   | 1.73E-03          | 2.40E-02                             | 5.88E-02                           | 3.91E-04                           |                               |                                        |
| ENSG00000255121 | RP11-110H1.12  | 11  | 2.01E-03          | 2.96E-01                             | 4.44E-04                           | 7.84E-02                           |                               |                                        |
| ENSG00000165804 | ZNF219         | 14  | 2.02E-03          | 6.42E-04                             | 7.22E-01                           | 2.72E-03                           |                               |                                        |
| ENSG00000145936 | KCNMB1         | 5   | 2.54E-03          | 3.15E-02                             | 1.01E-03                           | 6.06E-01                           |                               |                                        |
| ENSG00000105388 | CEACAM5        | 19  | 2.69E-03          | 6.35E-04                             | 1.28E-01                           | 3.33E-02                           |                               |                                        |
| ENSG00000175104 | TRAF6          | 11  | 2.84E-03          | 7.24E-02                             | 2.92E-02                           | 8.36E-04                           |                               |                                        |
| ENSG00000008256 | CYTH3          | 7   | 2.88E-03          | 4.04E-03                             | 4.21E-01                           | 8.75E-04                           |                               |                                        |
| ENSG00000150779 | TIMM8B         | 11  | 2.92E-03          | 3.36E-02                             | 1.16E-03                           | 6.09E-01                           |                               |                                        |
| ENSG00000138463 | DIRC2          | 3   | 3.27E-03          | 3.76E-03                             | 4.88E-01                           | 1.08E-03                           |                               |                                        |
| ENSG00000237161 | RP11-32B5.1    | 15  | 3.28E-03          | 4.77E-01                             | 3.89E-03                           | 3.89E-03                           |                               |                                        |
| ENSG00000007264 | MATK           | 19  | 3.30E-03          | 2.66E-03                             | 6.45E-01                           | 1.37E-03                           |                               |                                        |
| ENSG00000105928 | DFNA5          | 7   | 3.56E-03          | 6.27E-03                             | 3.44E-01                           | 9.72E-04                           |                               |                                        |
| ENSG00000236624 | CCDC163P       | 1   | 3.76E-03          | 9.02E-01                             | 1.46E-03                           | 1.83E-02                           |                               |                                        |
| ENSG00000271780 | RP11-1017G21.5 | 14  | 3.84E-03          | 9.49E-04                             | 4.49E-01                           | 9.41E-03                           |                               |                                        |
| ENSG00000160695 | VPS11          | 11  | 3.93E-03          | 1.71E-03                             | 9.86E-01                           | 2.90E-03                           |                               |                                        |
| ENSG00000184508 | HDDC3          | 15  | 4.09E-03          | 7.10E-01                             | 2.86E-03                           | 8.01E-03                           |                               |                                        |
| ENSG00000259431 | THTPA          | 14  | 4.69E-03          | 3.90E-02                             | 1.92E-03                           | 6.53E-01                           |                               |                                        |
| ENSG00000137944 | CCBL2          | 1   | 4.79E-03          | 1.25E-03                             | 5.13E-01                           | 9.39E-03                           |                               |                                        |
| ENSG00000229417 | NPM1P25        | 10  | 4.84E-03          | 7.84E-03                             | 3.60E-01                           | 1.34E-03                           |                               |                                        |
| ENSG00000234231 | AC093616.4     | 2   | 5.24E-03          | 2.53E-02                             | 1.37E-01                           | 1.22E-03                           |                               |                                        |
| ENSG00000160113 | NR2F6          | 19  | 5.32E-03          | 6.67E-02                             | 1.72E-03                           | 4.81E-01                           |                               |                                        |
| ENSG00000107796 | ACTA2          | 10  | 5.35E-03          | 1.26E-03                             | 2.11E-01                           | 3.20E-02                           |                               |                                        |
| ENSG00000104643 | MTMR9          | 8   | 5.46E-03          | 5.45E-01                             | 1.47E-03                           | 5.67E-02                           |                               |                                        |
| ENSG00000235883 | AC012379.1     | 15  | 5.66E-03          | 3.22E-02                             | 2.72E-03                           | 7.72E-01                           |                               |                                        |
| ENSG00000229944 | AC004797.1     | 17  | 5.72E-03          | 1.47E-02                             | 4.87E-03                           | 8.80E-01                           |                               |                                        |
| ENSG00000211974 | IGHV2-70       | 14  | 5.75E-03          | 1.51E-03                             | 1.23E-01                           | 6.09E-02                           |                               |                                        |
| ENSG00000147889 | CDKN2A         | 9   | 6.26E-03          | 1.67E-03                             | 5.32E-01                           | 1.11E-02                           |                               |                                        |
| ENSG00000226067 | LINC00869      | 1   | 6.51E-03          | 2.46E-02                             | 1.67E-01                           | 1.54E-03                           |                               |                                        |
| ENSG00000235245 | RP11-122K13.12 | 10  | 6.83E-03          | 6.81E-01                             | 2.07E-03                           | 4.48E-02                           |                               |                                        |
| ENSG00000267281 | RP11-793H13.10 | 12  | 6.89E-03          | 2.30E-03                             | 6.99E-02                           | 1.22E-01                           |                               |                                        |
| ENSG00000175505 | CLCF1          | 11  | 6.94E-03          | 6.43E-03                             | 5.55E-01                           | 2.44E-03                           |                               |                                        |
| ENSG00000087299 | L2HGDH         | 14  | 7.02E-03          | 3.96E-01                             | 9.80E-03                           | 5.45E-03                           |                               |                                        |
| ENSG00000108587 | GOSR1          | 17  | 7.05E-03          | 5.40E-03                             | 1.85E-02                           | 3.92E-01                           |                               |                                        |
| ENSG00000176986 | SEC24C         | 10  | 7.52E-03          | 3.64E-03                             | 9.21E-01                           | 4.44E-03                           |                               |                                        |

|                 |                 |    |          |          |          |          |                                                                                                                 |
|-----------------|-----------------|----|----------|----------|----------|----------|-----------------------------------------------------------------------------------------------------------------|
| ENSG00000168229 | PTGDR           | 14 | 8.24E-03 | 2.67E-03 | 8.08E-02 | 1.21E-01 | Kallionpaa et al<br>(Progression to T1D<br>vs Matched Controls)                                                 |
| ENSG00000113658 | SMAD5           | 5  | 8.49E-03 | 8.56E-02 | 6.23E-02 | 2.40E-03 |                                                                                                                 |
| ENSG00000267321 | RP11-1094M14.11 | 17 | 8.51E-03 | 8.14E-03 | 1.56E-02 | 5.02E-01 |                                                                                                                 |
| ENSG00000118197 | DDX59           | 1  | 8.56E-03 | 4.15E-01 | 1.11E-02 | 6.62E-03 | Kallionpaa et al<br>(Progression to T1D<br>vs Matched Controls)                                                 |
| ENSG00000061676 | NCKAP1          | 2  | 8.67E-03 | 7.92E-03 | 5.55E-01 | 3.01E-03 |                                                                                                                 |
| ENSG00000172819 | RARG            | 12 | 8.72E-03 | 3.47E-03 | 9.34E-01 | 6.44E-03 |                                                                                                                 |
| ENSG00000102547 | CAB39L          | 13 | 8.76E-03 | 1.02E-02 | 4.55E-01 | 2.70E-03 | Kallionpaa et al<br>(Seroconverted Cases<br>vs Matched Controls)<br>Ferreira et al 2014<br>(IFN inducible gene) |
| ENSG00000100311 | PDGFB           | 22 | 8.78E-03 | 2.75E-02 | 1.91E-01 | 2.14E-03 |                                                                                                                 |
| ENSG00000164953 | TMEM67          | 8  | 9.07E-03 | 2.30E-03 | 1.86E-01 | 5.47E-02 |                                                                                                                 |
| ENSG00000255150 | EID3            | 12 | 9.21E-03 | 2.26E-02 | 2.38E-01 | 2.30E-03 |                                                                                                                 |
| ENSG00000145337 | PYURF           | 4  | 9.65E-03 | 2.87E-03 | 6.53E-01 | 1.20E-02 |                                                                                                                 |
| ENSG00000047056 | WDR37           | 10 | 9.73E-03 | 7.38E-01 | 6.19E-03 | 1.52E-02 |                                                                                                                 |
